# Supplementary material
Source: publisher figshare collection journal article supplement (https://frontiersin.figshare.com/ndownloader/files/24560327)
Supplement: Supplementary file 1 [file 24560327]

# Supplementary Table 3. Aboveground biomass, plant density and nitrogen content in the whole plant of upland rice, palisadegrass, and guineagrass monocropped or intercropped as a function of sidedress nitrogen rates for upland rice crops measured on the day of upland rice harvesting.

|  | Aboveground biomass | | |  | Plant density | |  | Nitrogen content | | |
| --- | --- | --- | --- | --- | --- | --- | --- | --- | --- | --- |
| Treatment | Rice | Forage | Total |  | Rice† | Forage |  | Rice | Forage | Total |
| Monocropped rice | g m–2 | | |  | plants m–2 | |  | g m–2 | | |
| 0 kg ha–1 | 466 | - | 466 |  | 118 | - |  | 4.8 | - | 4.8 |
| 40 kg ha–1 | 637 | - | 607 |  | 143 | - |  | 8.8 | - | 8.8 |
| 80 kg ha–1 | 833 | - | 833 |  | 162 | - |  | 13.0 | - | 13.0 |
| 120 kg ha–1 | 907 | - | 947 |  | 152 | - |  | 13.2 | - | 13.2 |
| Rice + palisadegrass |  |  |  |  |  |  |  |  |  |  |
| 0 kg ha–1 | 445 | 490 | 935 |  | 101 | 4.1 |  | 4.0 | 7.4 | 11.4 |
| 40 kg ha–1 | 526 | 579 | 1105 |  | 137 | 5.1 |  | 7.6 | 10.7 | 18.3 |
| 80 kg ha–1 | 807 | 887 | 1694 |  | 158 | 5.1 |  | 12.2 | 15.5 | 27.7 |
| 120 kg ha–1 | 797 | 877 | 1675 |  | 152 | 5.3 |  | 12.3 | 16.8 | 29.1 |
| Rice + guineagrass |  |  |  |  |  |  |  |  |  |  |
| 0 kg ha–1 | 447 | 491 | 938 |  | 111 | 4.1 |  | 3.9 | 7.7 | 11.6 |
| 40 kg ha–1 | 528 | 581 | 1109 |  | 138 | 5.3 |  | 7.6 | 11.2 | 18.8 |
| 80 kg ha–1 | 780 | 858 | 1637 |  | 153 | 5.3 |  | 11.9 | 15.4 | 27.3 |
| 120 kg ha–1 | 733 | 806 | 1540 |  | 147 | 5.3 |  | 11.9 | 15.8 | 27.6 |
| Palisadegrass | - | 920 | 920 |  | - | 6.0 |  | - | 12.3 | 12.3 |
| Guineagrass | - | 1459 | 1459 |  | - | 6.1 |  | - | 18.8 | 18.8 |

† The number of rice tillers m–2 was considered to be the plant density.
